# Supplementary material for: A cell epigenotype specific model for the correction of brain cellular heterogeneity bias and its application to age, brain region and major depression
Source: PubMed Central journal article supplement — Epigenetics. 2013 Feb 20;8(3):290–302. doi: 10.4161/epi.23924 (PMC3669121; doi:10.4161/epi.23924), 2013-02-20
Supplement: epi-8-290-s01.pdf [file epi-8-290-s01.pdf]

## **Supplemental Material to:**

**Jerry Guintivano, Martin Aryee and Zachary Kaminsky**

**A cell epigenotype specific model for the correction of  
brain cellular heterogeneity bias and its application to  
age, brain region, and major depression**

**Epigenetics 2012; 8(3)**

**<http://dx.doi.org/10.4161/epi.23924>**

**[http://www.landesbioscience.com/journals/epigenetics/  
article/23924/](http://www.landesbioscience.com/journals/epigenetics/article/23924/)**

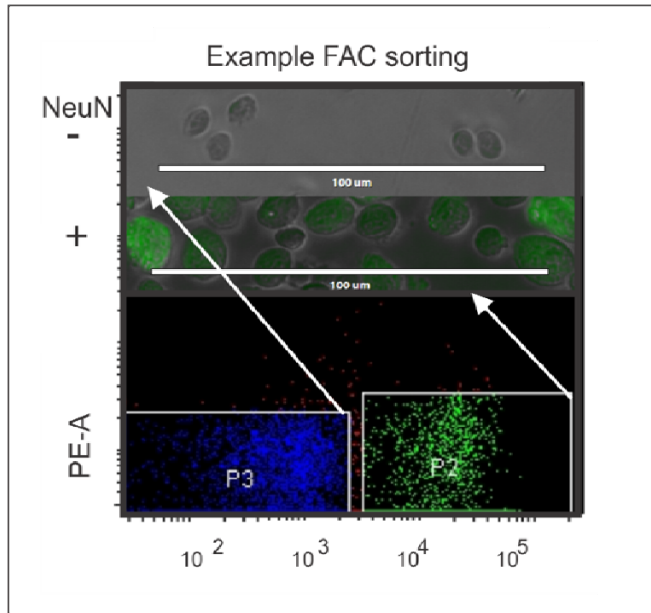

**Supplementary Figure 1. FACS Sorting of neuronal and non-neuronal nuclei**

Fluorescent microscopy image of FACS isolated neuronal and non-neuronal nuclei and an example plot of FACS sorting gates distinguishing NeuN positive neurons from NeuN negative non-neuronal cells.

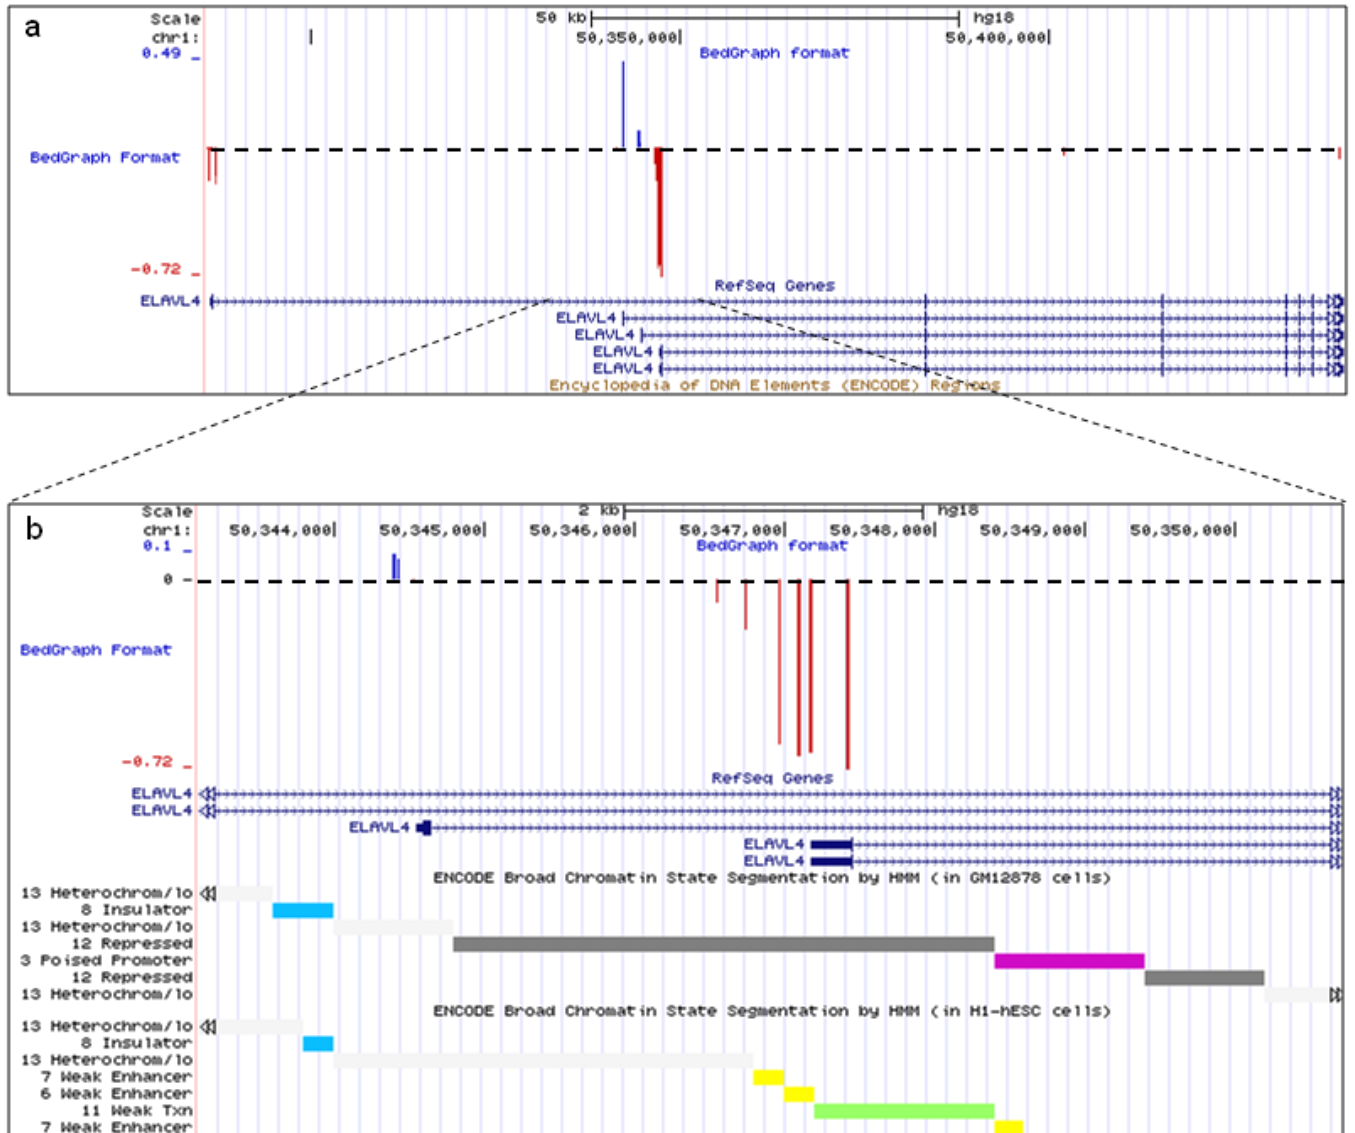

**Supplementary Figure 2. UCSC genome browser tracks of cell-type specific DNA methylation differences**

A.) An image derived from the UCSC genome browser (<http://genome.ucsc.edu/>) depicting cell-type specific epigenetic patterns via Bedgraph tracks over RefSeq gene tracks of the *ELAVL4* gene, a gene thought to be involved in neuron specific RNA processing. The mean percentage of neurons minus non-neurons (y-axis) is depicted as a function of the relative genomic coordinates per CpG on the hg18 human genome build (x-axis). Positive values are depicted in blue and negative values are depicted in red. B.) A blow up of the promoter region of an alternatively spliced variate of *ELAVL4*. ENCODE Chromatin State Segmentation by HMM tracks are depicted for the GM12878 lymphoblastoid cell line and the H1-hESC human embryonic stem cell line and demonstrate that cell-type specific epigenetic patterns fall within regulatory regions that appear to vary based on alternative splice variants of the gene. Yellow, green, blue, purple, and grey tracks depict weak enhancers, weak transcription start sites, insulator sequences, poised promoters, and heterochromatic regions, respectively.

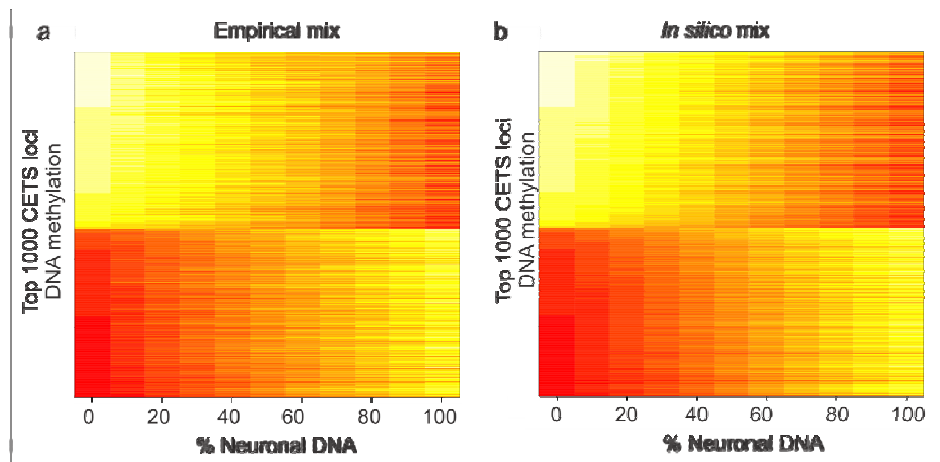

### Supplementary Figure 3. Reconstitution experiment

A.) Heat maps of DNA methylation at the top 1000 CETS markers as measured by HM450 microarray probes vs. the proportion of mixed non-neuronal to neuronal DNA content in the empirically mixed reconstitution experiment. B.) An *in silico* profile using only DNA methylation profiles from 100% neurons and 100% non-neurons. Yellow and red denote beta values of methylated and un-methylated DNA, respectively.

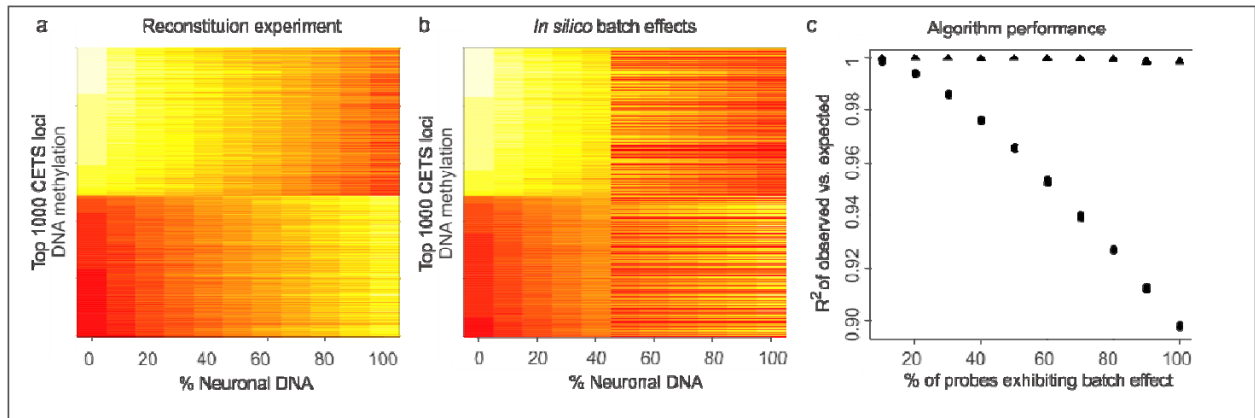

**Supplementary Figure 4. Induction and evaluation of robustness to batch effects**

A.) Heat maps of DNA methylation at the top 1000 CETS markers as measured by HM450 microarray probes vs. the proportion of mixed non-neuronal to neuronal DNA content in the empirically mixed reconstitution experiment. B.) An example of an *in silico* batch effect where a randomly selected 40% of loci have an induced increase in DNA methylation percentage by 20%. C.) Performance of the CETS model prediction (triangles) and the quadratic programming algorithm (circles) at predicting the proper proportions of empirical mixes in the reconstitution experiment (x-axis) as a function of the percentage of probes randomly influenced by the batch effect.

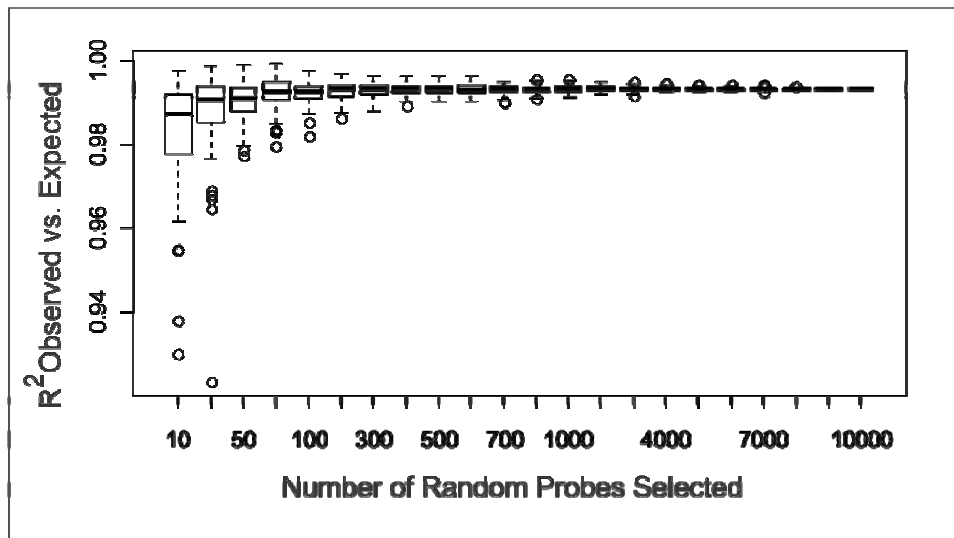

**Supplementary Figure 5. Performance of randomly selected CETS loci**

Box plots of the R<sup>2</sup> value obtained predicting the neuronal composition of the reconstitution experiment (y-axis) at variable numbers of randomly selected probes within the top 10000 CETS marker loci (x-axis).

**Supplementary Table 1:** *Significantly Over-represented Gene Ontology Categories at top 1000 CETS loci*

| <b>Gene Ontology</b> | <b>Corrected P value</b> | <b>Expected Freq</b> | <b>Observed Freq</b> | <b>Description</b>                                    |
|----------------------|--------------------------|----------------------|----------------------|-------------------------------------------------------|
| GO:0007399           | 3.1E-14                  | 0.19                 | 0.07                 | nervous system development                            |
| GO:0048731           | 3.7E-11                  | 0.29                 | 0.05                 | system development                                    |
| GO:0048856           | 2.9E-10                  | 0.31                 | 0.05                 | anatomical structure development                      |
| GO:0022008           | 4.8E-10                  | 0.13                 | 0.07                 | neurogenesis                                          |
| GO:0048468           | 1.2E-09                  | 0.15                 | 0.06                 | cell development                                      |
| GO:0007275           | 1.3E-09                  | 0.31                 | 0.05                 | multicellular organismal development                  |
| GO:0032502           | 1.8E-09                  | 0.34                 | 0.05                 | developmental process                                 |
| GO:0048699           | 3.7E-09                  | 0.12                 | 0.07                 | generation of neurons                                 |
| GO:0009653           | 4.3E-09                  | 0.19                 | 0.06                 | anatomical structure morphogenesis                    |
| GO:0048667           | 1.0E-08                  | 0.08                 | 0.09                 | cell morphogenesis involved in neuron differentiation |
| GO:0048812           | 1.6E-08                  | 0.08                 | 0.09                 | neuron projection morphogenesis                       |
| GO:0048666           | 4.4E-08                  | 0.10                 | 0.08                 | neuron development                                    |
| GO:0031175           | 4.7E-08                  | 0.09                 | 0.08                 | neuron projection development                         |
| GO:0030182           | 1.0E-07                  | 0.11                 | 0.07                 | neuron differentiation                                |
| GO:0045202           | 1.6E-07                  | 0.07                 | 0.09                 | synapse                                               |
| GO:0032990           | 2.3E-07                  | 0.09                 | 0.08                 | cell part morphogenesis                               |
| GO:0030030           | 2.7E-07                  | 0.10                 | 0.07                 | cell projection organization                          |
| GO:0048858           | 3.4E-07                  | 0.09                 | 0.08                 | cell projection morphogenesis                         |
| GO:0007154           | 5.2E-07                  | 0.36                 | 0.04                 | cell communication                                    |
| GO:0007409           | 6.4E-07                  | 0.07                 | 0.08                 | axonogenesis                                          |
| GO:0000904           | 7.0E-07                  | 0.09                 | 0.08                 | cell morphogenesis involved in differentiation        |
| GO:0035637           | 7.8E-07                  | 0.09                 | 0.07                 | multicellular organismal signaling                    |
| GO:0032501           | 1.1E-06                  | 0.39                 | 0.04                 | multicellular organismal process                      |
| GO:0019226           | 1.6E-06                  | 0.09                 | 0.07                 | transmission of nerve impulse                         |
| GO:0030154           | 1.7E-06                  | 0.22                 | 0.05                 | cell differentiation                                  |
| GO:0023052           | 2.2E-06                  | 0.35                 | 0.04                 | signaling                                             |
| GO:0048869           | 6.3E-06                  | 0.23                 | 0.05                 | cellular developmental process                        |
| GO:0032989           | 1.2E-05                  | 0.10                 | 0.06                 | cellular component morphogenesis                      |
| GO:0007268           | 2.1E-05                  | 0.08                 | 0.07                 | synaptic transmission                                 |
| GO:0000902           | 2.2E-05                  | 0.10                 | 0.06                 | cell morphogenesis                                    |
| GO:0043005           | 2.2E-05                  | 0.08                 | 0.07                 | neuron projection                                     |
| GO:0071842           | 3.8E-05                  | 0.25                 | 0.05                 | cellular component organization at cellular level     |

|            |         |      |      |                                                                 |
|------------|---------|------|------|-----------------------------------------------------------------|
| GO:0016043 | 5.4E-05 | 0.30 | 0.04 | cellular component organization                                 |
| GO:0023051 | 5.8E-05 | 0.17 | 0.05 | regulation of signaling                                         |
| GO:0042995 | 8.5E-05 | 0.12 | 0.06 | cell projection                                                 |
| GO:0050794 | 1.5E-04 | 0.50 | 0.04 | regulation of cellular process                                  |
| GO:0048519 | 1.9E-04 | 0.24 | 0.04 | negative regulation of biological process                       |
| GO:0046903 | 2.1E-04 | 0.09 | 0.06 | secretion                                                       |
| GO:0065007 | 2.3E-04 | 0.55 | 0.04 | biological regulation                                           |
| GO:0010646 | 2.4E-04 | 0.13 | 0.05 | regulation of cell communication                                |
| GO:0051552 | 2.6E-04 | 0.01 | 0.83 | flavone metabolic process                                       |
| GO:0050804 | 2.9E-04 | 0.04 | 0.11 | regulation of synaptic transmission                             |
| GO:0071841 | 3.4E-04 | 0.25 | 0.04 | cellular component organization or biogenesis at cellular level |
| GO:0048523 | 3.9E-04 | 0.22 | 0.05 | negative regulation of cellular process                         |
| GO:0030425 | 4.5E-04 | 0.05 | 0.09 | dendrite                                                        |
| GO:0071840 | 5.0E-04 | 0.30 | 0.04 | cellular component organization or biogenesis                   |
| GO:0050877 | 5.3E-04 | 0.11 | 0.06 | neurological system process                                     |
| GO:0003008 | 8.8E-04 | 0.14 | 0.05 | system process                                                  |
| GO:0051969 | 9.4E-04 | 0.04 | 0.10 | regulation of transmission of nerve impulse                     |
| GO:0065008 | 1.6E-03 | 0.20 | 0.05 | regulation of biological quality                                |
| GO:0044456 | 1.6E-03 | 0.05 | 0.08 | synapse part                                                    |
| GO:0051179 | 1.8E-03 | 0.29 | 0.04 | localization                                                    |
| GO:0030234 | 2.1E-03 | 0.09 | 0.06 | enzyme regulator activity                                       |
| GO:0050789 | 2.1E-03 | 0.52 | 0.04 | regulation of biological process                                |
| GO:0051716 | 2.6E-03 | 0.35 | 0.04 | cellular response to stimulus                                   |
| GO:0060589 | 2.6E-03 | 0.05 | 0.07 | nucleoside-triphosphatase regulator activity                    |
| GO:0031644 | 2.7E-03 | 0.04 | 0.10 | regulation of neurological system process                       |
| GO:0006836 | 3.1E-03 | 0.03 | 0.12 | neurotransmitter transport                                      |
| GO:0003001 | 3.2E-03 | 0.05 | 0.08 | generation of a signal involved in cell-cell signaling          |
| GO:0023061 | 3.2E-03 | 0.05 | 0.08 | signal release                                                  |
| GO:0008092 | 3.5E-03 | 0.07 | 0.07 | cytoskeletal protein binding                                    |
| GO:0052695 | 5.2E-03 | 0.01 | 0.40 | cellular glucuronidation                                        |
| GO:0007165 | 5.9E-03 | 0.30 | 0.04 | signal transduction                                             |
| GO:0050896 | 6.0E-03 | 0.44 | 0.04 | response to stimulus                                            |
| GO:0007267 | 7.2E-03 | 0.10 | 0.05 | cell-cell signaling                                             |
| GO:0009790 | 7.5E-03 | 0.09 | 0.06 | embryo development                                              |



|            |         |      |      |                                                   |
|------------|---------|------|------|---------------------------------------------------|
| GO:0007010 | 7.7E-03 | 0.08 | 0.06 | cytoskeleton organization                         |
| GO:0015020 | 8.2E-03 | 0.01 | 0.24 | glucuronosyltransferase activity                  |
| GO:0007269 | 8.9E-03 | 0.02 | 0.14 | neurotransmitter secretion                        |
| GO:0007411 | 1.0E-02 | 0.05 | 0.08 | axon guidance                                     |
| GO:0008289 | 1.1E-02 | 0.07 | 0.06 | lipid binding                                     |
| GO:0030695 | 1.1E-02 | 0.05 | 0.07 | GTPase regulator activity                         |
| GO:0040011 | 1.2E-02 | 0.11 | 0.05 | locomotion                                        |
| GO:0044327 | 1.4E-02 | 0.02 | 0.12 | dendritic spine head                              |
| GO:0014069 | 1.4E-02 | 0.02 | 0.12 | postsynaptic density                              |
| GO:0044309 | 1.4E-02 | 0.03 | 0.10 | neuron spine                                      |
| GO:0043197 | 1.4E-02 | 0.03 | 0.10 | dendritic spine                                   |
| GO:0048513 | 1.8E-02 | 0.18 | 0.04 | organ development                                 |
| GO:0007417 | 1.8E-02 | 0.07 | 0.06 | central nervous system development                |
| GO:0032940 | 1.9E-02 | 0.07 | 0.06 | secretion by cell                                 |
| GO:0001505 | 2.1E-02 | 0.02 | 0.11 | regulation of neurotransmitter levels             |
| GO:0052696 | 2.2E-02 | 0.01 | 0.67 | flavonoid glucuronidation                         |
| GO:0052697 | 2.2E-02 | 0.01 | 0.67 | xenobiotic glucuronidation                        |
| GO:0009966 | 2.2E-02 | 0.14 | 0.05 | regulation of signal transduction                 |
| GO:0005856 | 2.2E-02 | 0.14 | 0.05 | cytoskeleton                                      |
| GO:0030054 | 2.3E-02 | 0.07 | 0.06 | cell junction                                     |
| GO:0051234 | 2.5E-02 | 0.24 | 0.04 | establishment of localization                     |
| GO:0044057 | 2.5E-02 | 0.05 | 0.07 | regulation of system process                      |
| GO:0006063 | 3.6E-02 | 0.01 | 0.30 | uronic acid metabolic process                     |
| GO:0019585 | 3.6E-02 | 0.01 | 0.30 | glucuronate metabolic process                     |
| GO:0016758 | 3.7E-02 | 0.03 | 0.09 | transferase activity, transferring hexosyl groups |
| GO:0016020 | 4.2E-02 | 0.49 | 0.04 | membrane                                          |
| GO:0035556 | 4.3E-02 | 0.14 | 0.05 | intracellular signal transduction                 |
| GO:0009987 | 4.6E-02 | 0.74 | 0.03 | cellular process                                  |
| GO:0044297 | 4.6E-02 | 0.04 | 0.08 | cell body                                         |

---

**Supplementary Table 2: DMRs Identified Between MDD and Controls in the SMRI Cohort using CETS Model Normalized Data**

| Chr   | DMR Start Position | DMR End Position | Strand | Con M value | MDD M value | P value | Q value | Gene           |
|-------|--------------------|------------------|--------|-------------|-------------|---------|---------|----------------|
| chr1  | 149205007          | 149207269        | -      | -0.17       | 0.22        | 3.9E-05 | 0.02    | CERS2          |
| chrX  | 46963843           | 46965626         | +      | -0.23       | 0.07        | 4.9E-05 | 0.02    | CDK16          |
| chr1  | 177258142          | 177260823        | +      | -0.16       | 0.19        | 8.1E-05 | 0.03    | FAM20B         |
| chr4  | 24639056           | 24640556         | -      | -0.13       | 0.16        | 5.7E-04 | 0.09    | LGI2           |
| chr11 | 64165119           | 64166240         | -      | -0.17       | 0.09        | 9.2E-04 | 0.09    | NRXN2          |
| chr11 | 2646100            | 2647390          | +      | -0.20       | 0.19        | 9.9E-04 | 0.09    | KCNQ1          |
| chr11 | 2646100            | 2647390          | -      | -0.20       | 0.19        | 9.9E-04 | 0.09    | KCNQ10T1       |
| chr2  | 27457680           | 27458835         | -      | -0.19       | 0.34        | 1.0E-03 | 0.09    | PPM1G          |
| chr2  | 240722028          | 240723321        | -      | -0.12       | 0.17        | 1.0E-03 | 0.09    | MYEOV2         |
| chr2  | 240722028          | 240723321        | -      | -0.12       | 0.17        | 1.0E-03 | 0.09    | OTOS           |
| chr12 | 128901255          | 128903704        | -      | -0.16       | 0.14        | 1.2E-03 | 0.09    | TMEM132D       |
| chr18 | 72665010           | 72666135         | +      | -0.22       | 0.29        | 1.2E-03 | 0.09    | ZNF236         |
| chr8  | 65454106           | 65455384         | +      | 0.08        | -0.10       | 1.4E-03 | 0.09    | MIR124-2       |
| chr9  | 35596963           | 35598217         | -      | -0.10       | 0.30        | 1.4E-03 | 0.09    | CD72           |
| chr9  | 35596963           | 35598217         | +      | -0.10       | 0.30        | 1.4E-03 | 0.09    | MIR4667        |
| chr9  | 35596963           | 35598217         | +      | -0.10       | 0.30        | 1.4E-03 | 0.09    | TESK1          |
| chr15 | 41448049           | 41448880         | +      | -0.29       | 0.33        | 1.4E-03 | 0.09    | TUBGCP4        |
| chr15 | 41448049           | 41448880         | -      | -0.29       | 0.33        | 1.4E-03 | 0.09    | ZSCAN29        |
| chr6  | 19942656           | 19943598         | +      | -0.20       | 0.17        | 1.4E-03 | 0.09    | ID4            |
| chr10 | 71682451           | 71683820         | -      | -0.18       | 0.11        | 1.5E-03 | 0.09    | NPFFR1         |
| chr21 | 42514676           | 42515666         | +      | -0.17       | 0.05        | 1.5E-03 | 0.09    | ABCG1          |
| chr11 | 61205037           | 61206245         | +      | -0.18       | 0.15        | 1.8E-03 | 0.09    | DAGLA          |
| chr18 | 42748311           | 42749636         | -      | -0.21       | 0.08        | 1.8E-03 | 0.09    | PIAS2          |
| chr5  | 10810689           | 10813272         | -      | -0.12       | 0.25        | 2.0E-03 | 0.09    | DAP            |
| chr16 | 24930974           | 24932491         | -      | -0.18       | 0.18        | 2.0E-03 | 0.09    | ARHGAP17       |
| chr17 | 41333088           | 41334478         | +      | -0.15       | 0.06        | 2.0E-03 | 0.09    | MAPT           |
| chr2  | 46776712           | 46779284         | +      | -0.13       | 0.12        | 2.1E-03 | 0.09    | SOCS5          |
| chr2  | 66524037           | 66525057         | +      | 0.19        | -0.09       | 2.3E-03 | 0.09    | MEIS1          |
| chr13 | 31897083           | 31898689         | -      | -0.17       | 0.16        | 2.5E-03 | 0.09    | N4BP2L1        |
| chr6  | 1566549            | 1567892          | -      | 0.17        | -0.08       | 2.6E-03 | 0.09    | GMDS           |
| chr3  | 48447035           | 48447980         | -      | -0.20       | 0.22        | 2.6E-03 | 0.09    | CCDC51         |
| chr12 | 12738945           | 12739887         | -      | -0.21       | 0.31        | 2.6E-03 | 0.09    | GPR19          |
| chr9  | 102276236          | 102277338        | +      | -0.13       | 0.02        | 2.7E-03 | 0.09    | C9orf30-TMEFF1 |
| chr9  | 102276236          | 102277338        | +      | -0.13       | 0.02        | 2.7E-03 | 0.09    | TMEFF1         |
| chr2  | 45727957           | 45728971         | +      | -0.17       | 0.15        | 2.8E-03 | 0.09    | PRKCE          |
| chr1  | 152793949          | 152794964        | -      | -0.14       | 0.17        | 2.8E-03 | 0.09    | UBE2Q1         |
| chr19 | 18806136           | 18809906         | +      | -0.15       | 0.18        | 2.8E-03 | 0.09    | UPF1           |
| chr7  | 99527097           | 99528437         | +      | -0.12       | 0.22        | 2.9E-03 | 0.09    | COPS6          |
| chr7  | 99527097           | 99528437         | -      | -0.12       | 0.22        | 2.9E-03 | 0.09    | MCM7           |
| chr7  | 99527097           | 99528437         | -      | -0.12       | 0.22        | 2.9E-03 | 0.09    | MIR106B        |
| chr7  | 99527097           | 99528437         | -      | -0.12       | 0.22        | 2.9E-03 | 0.09    | MIR25          |
| chr7  | 99527097           | 99528437         | -      | -0.12       | 0.22        | 2.9E-03 | 0.09    | MIR93          |

|       |           |           |   |       |       |         |      |           |
|-------|-----------|-----------|---|-------|-------|---------|------|-----------|
| chr14 | 59625050  | 59626775  | + | -0.25 | 0.25  | 3.1E-03 | 0.09 | C14orf135 |
| chr6  | 43349584  | 43350421  | + | -0.25 | 0.19  | 3.1E-03 | 0.09 | TTBK1     |
| chr8  | 123864819 | 123865925 | + | -0.21 | 0.05  | 3.1E-03 | 0.09 | ZHX2      |
| chr11 | 67734524  | 67735497  | - | -0.15 | 0.14  | 3.6E-03 | 0.09 | SUV420H1  |
| chr12 | 619020    | 620405    | - | -0.21 | 0.17  | 3.6E-03 | 0.09 | NINJ2     |
| chr18 | 10717206  | 10718300  | - | -0.22 | 0.17  | 3.6E-03 | 0.09 | PIEZO2    |
| chr15 | 63453612  | 63454521  | - | -0.21 | 0.23  | 3.7E-03 | 0.09 | IGDCC3    |
| chr18 | 19338642  | 19341009  | + | -0.21 | 0.13  | 3.7E-03 | 0.09 | C18orf8   |
| chr16 | 30290036  | 30290945  | + | -0.15 | 0.15  | 3.8E-03 | 0.09 | MYLPF     |
| chr11 | 82119685  | 82120597  | - | -0.13 | 0.02  | 3.8E-03 | 0.09 | FAM181B   |
| chr14 | 73252127  | 73253442  | - | -0.21 | 0.19  | 3.8E-03 | 0.09 | C14orf43  |
| chr3  | 148605310 | 148606048 | + | 0.22  | -0.17 | 3.9E-03 | 0.09 | ZIC1      |
| chr3  | 148605310 | 148606048 | - | 0.22  | -0.17 | 3.9E-03 | 0.09 | ZIC4      |
| chrX  | 49011887  | 49012808  | + | -0.15 | 0.00  | 3.9E-03 | 0.09 | PPP1R3F   |
| chr19 | 59336763  | 59337884  | + | -0.16 | 0.27  | 4.1E-03 | 0.09 | CNOT3     |
| chr8  | 1748166   | 1749177   | + | -0.28 | 0.18  | 4.1E-03 | 0.09 | MIR596    |
| chr2  | 28643762  | 28645072  | + | -0.15 | 0.25  | 4.1E-03 | 0.09 | PLB1      |
| chr9  | 135226940 | 135227953 | - | -0.11 | 0.13  | 4.3E-03 | 0.09 | SURF4     |
| chr7  | 131913456 | 131914368 | - | -0.18 | 0.29  | 4.5E-03 | 0.09 | PLXNA4    |
| chr7  | 142765236 | 142766108 | - | -0.13 | 0.24  | 4.5E-03 | 0.09 | FAM131B   |
| chr1  | 45857508  | 45858521  | - | -0.23 | 0.09  | 5.0E-03 | 0.10 | CCDC17    |
| chr1  | 90060313  | 90061188  | + | -0.13 | 0.09  | 5.1E-03 | 0.10 | LRRRC8D   |
| chr13 | 40664060  | 40665179  | - | -0.14 | 0.23  | 5.2E-03 | 0.10 | KBTBD7    |
| chr1  | 145112378 | 145113308 | + | -0.20 | 0.08  | 5.2E-03 | 0.10 | PDIA3P    |
| chr17 | 6864655   | 6865600   | + | -0.12 | 0.14  | 5.3E-03 | 0.10 | BCL6B     |
| chr17 | 8472272   | 8473007   | - | -0.11 | 0.04  | 5.3E-03 | 0.10 | MYH10     |
| chr19 | 10393453  | 10394257  | + | -0.15 | 0.11  | 5.4E-03 | 0.10 | PDE4A     |
| chr19 | 44571225  | 44572032  | + | -0.13 | 0.26  | 5.5E-03 | 0.10 | MED29     |
| chr19 | 44571225  | 44572032  | - | -0.13 | 0.26  | 5.5E-03 | 0.10 | PAF1      |
| chr20 | 17538065  | 17538760  | - | -0.26 | 0.14  | 5.5E-03 | 0.10 | RRBP1     |
| chr8  | 141605860 | 141606708 | - | -0.19 | 0.07  | 5.8E-03 | 0.10 | EIF2C2    |
| chr21 | 42029452  | 42030526  | - | -0.14 | 0.16  | 5.8E-03 | 0.10 | RIPK4     |
| chr8  | 117846305 | 117847314 | + | -0.25 | 0.10  | 5.9E-03 | 0.10 | UTP23     |
| chr21 | 46688703  | 46689662  | + | -0.22 | 0.15  | 5.9E-03 | 0.10 | PCNT      |
| chr17 | 61726624  | 61727730  | + | -0.14 | 0.19  | 5.9E-03 | 0.10 | PRKCA     |
| chr4  | 108858413 | 108859265 | - | -0.15 | 0.03  | 6.2E-03 | 0.10 | PAPSS1    |
| chr14 | 104335698 | 104337022 | + | -0.21 | 0.16  | 6.7E-03 | 0.11 | ZBTB42    |
| chr1  | 241705671 | 241706511 | + | -0.12 | 0.23  | 7.1E-03 | 0.11 | SDCCAG8   |
| chr17 | 7321840   | 7322572   | + | -0.13 | 0.02  | 7.5E-03 | 0.11 | SLC35G6   |
| chr17 | 7321840   | 7322572   | - | -0.13 | 0.02  | 7.5E-03 | 0.11 | ZBTB4     |
| chr19 | 63146186  | 63147161  | - | -0.16 | 0.17  | 7.6E-03 | 0.11 | ZNF256    |
| chr1  | 191356259 | 191357046 | + | -0.19 | 0.05  | 7.8E-03 | 0.11 | CDC73     |
|       |           |           |   |       |       |         |      | DNAJC25-  |
| chr9  | 113434899 | 113436010 | + | -0.19 | 0.13  | 7.9E-03 | 0.11 | GNG10     |
| chr9  | 113434899 | 113436010 | + | -0.19 | 0.13  | 7.9E-03 | 0.11 | DNAJC25   |
| chr2  | 130828273 | 130829181 | + | -0.18 | 0.19  | 7.9E-03 | 0.11 | PTPN18    |
| chr9  | 118490209 | 118490911 | - | -0.15 | 0.03  | 8.0E-03 | 0.11 | ASTN2     |
| chr9  | 118490209 | 118490911 | + | -0.15 | 0.03  | 8.0E-03 | 0.11 | TRIM32    |

|       |           |           |   |       |       |         |      |            |
|-------|-----------|-----------|---|-------|-------|---------|------|------------|
| chrX  | 48662051  | 48662717  | - | -0.16 | 0.02  | 8.0E-03 | 0.11 | OTUD5      |
| chr1  | 35793439  | 35794207  | - | -0.14 | 0.05  | 8.0E-03 | 0.11 | KIAA0319L  |
| chr1  | 35793439  | 35794207  | + | -0.14 | 0.05  | 8.0E-03 | 0.11 | NCDN       |
| chr6  | 117974266 | 117975034 | + | -0.07 | 0.25  | 8.1E-03 | 0.11 | DCBLD1     |
| chrX  | 122923708 | 122924379 | + | -0.13 | 0.00  | 8.5E-03 | 0.12 | STAG2      |
| chr11 | 71490269  | 71491178  | - | -0.09 | 0.17  | 8.6E-03 | 0.12 | LAMTOR1    |
| chr11 | 71490269  | 71491178  | + | -0.09 | 0.17  | 8.6E-03 | 0.12 | LRTOMT     |
| chr1  | 165154952 | 165155747 | - | -0.15 | 0.15  | 8.6E-03 | 0.12 | ILDR2      |
| chr1  | 167340362 | 167341097 | + | -0.24 | 0.11  | 9.3E-03 | 0.12 | ATP1B1     |
| chr1  | 231008657 | 231009287 | + | -0.20 | 0.08  | 9.4E-03 | 0.12 | KIAA1383   |
| chr1  | 154447763 | 154448357 | + | -0.26 | 0.21  | 9.5E-03 | 0.12 | PMF1-BGLAP |
| chr1  | 154447763 | 154448357 | + | -0.26 | 0.21  | 9.5E-03 | 0.12 | PMF1       |
| chr1  | 154447763 | 154448357 | + | -0.26 | 0.21  | 9.5E-03 | 0.12 | SLC25A44   |
| chrX  | 68300264  | 68300942  | - | -0.20 | 0.08  | 9.7E-03 | 0.12 | PJA1       |
| chr19 | 46574695  | 46575406  | + | -0.16 | 0.16  | 9.9E-03 | 0.12 | TMEM91     |
| chr6  | 109875204 | 109875903 | - | -0.20 | 0.21  | 9.9E-03 | 0.12 | MICAL1     |
| chr11 | 1721356   | 1721917   | - | -0.15 | 0.27  | 9.9E-03 | 0.12 | IFITM10    |
| chr11 | 1721356   | 1721917   | - | -0.15 | 0.27  | 9.9E-03 | 0.12 | MOB2       |
| chr2  | 98592630  | 98593365  | + | -0.15 | 0.27  | 1.0E-02 | 0.12 | UNC50      |
| chr5  | 96170866  | 96172056  | - | -0.13 | 0.17  | 1.0E-02 | 0.12 | ERAP1      |
| chr8  | 31008436  | 31009105  | - | -0.26 | 0.25  | 1.0E-02 | 0.12 | PURG       |
| chr8  | 31008436  | 31009105  | + | -0.26 | 0.25  | 1.0E-02 | 0.12 | WRN        |
| chr11 | 1861935   | 1862643   | + | -0.20 | 0.29  | 1.0E-02 | 0.12 | LSP1       |
| chr10 | 14687772  | 14688330  | - | -0.25 | 0.14  | 1.0E-02 | 0.12 | FAM107B    |
| chr10 | 448015    | 448714    | - | -0.19 | 0.16  | 1.1E-02 | 0.12 | DIP2C      |
| chr4  | 141394232 | 141395189 | + | -0.16 | 0.04  | 1.1E-02 | 0.12 | SCOC       |
| chr15 | 98696403  | 98697183  | - | -0.13 | 0.11  | 1.1E-02 | 0.12 | ADAMTS17   |
| chrX  | 46658048  | 46658687  | + | -0.18 | 0.05  | 1.1E-02 | 0.12 | PHF16      |
| chr10 | 42289709  | 42290303  | + | -0.22 | 0.24  | 1.1E-02 | 0.12 | LOC84856   |
| chr7  | 44127559  | 44128331  | - | -0.19 | 0.21  | 1.1E-02 | 0.12 | POLD2      |
| chrX  | 48652807  | 48653506  | - | -0.16 | 0.03  | 1.1E-02 | 0.12 | PIM2       |
| chrX  | 48652807  | 48653506  | - | -0.16 | 0.03  | 1.1E-02 | 0.12 | SLC35A2    |
| chr12 | 68267498  | 68268230  | + | -0.25 | 0.28  | 1.1E-02 | 0.12 | CCT2       |
| chr1  | 201539178 | 201540054 | + | -0.06 | 0.21  | 1.1E-02 | 0.12 | BTG2       |
| chr1  | 201539178 | 201540054 | - | -0.06 | 0.21  | 1.1E-02 | 0.12 | LOC730227  |
| chr1  | 247070836 | 247071446 | - | -0.22 | 0.39  | 1.2E-02 | 0.12 | SH3BP5L    |
| chr11 | 304013    | 305240    | + | 0.11  | -0.14 | 1.2E-02 | 0.12 | IFITM1     |
| chr10 | 75200551  | 75201325  | + | -0.18 | 0.08  | 1.2E-02 | 0.12 | FUT11      |
| chr10 | 75200551  | 75201325  | + | -0.18 | 0.08  | 1.2E-02 | 0.12 | SEC24C     |
| chr1  | 119963865 | 119964588 | - | -0.16 | 0.21  | 1.2E-02 | 0.12 | ZNF697     |
| chr5  | 83052359  | 83053195  | - | -0.16 | 0.08  | 1.2E-02 | 0.12 | HAPLN1     |
| chr9  | 35063775  | 35064737  | - | -0.10 | 0.18  | 1.2E-02 | 0.12 | FANCG      |
| chr1  | 101477375 | 101478182 | + | 0.14  | -0.12 | 1.2E-02 | 0.12 | S1PR1      |
| chr18 | 46337590  | 46338545  | + | -0.17 | 0.10  | 1.2E-02 | 0.12 | MAPK4      |
| chr12 | 6545756   | 6546918   | - | -0.14 | 0.12  | 1.2E-02 | 0.12 | CHD4       |
| chr12 | 6545756   | 6546918   | - | -0.14 | 0.12  | 1.2E-02 | 0.12 | NOP2       |
| chr10 | 126671127 | 126671960 | - | -0.17 | 0.16  | 1.3E-02 | 0.12 | CTBP2      |
| chr5  | 180552907 | 180553597 | - | -0.27 | 0.13  | 1.3E-02 | 0.12 | TRIM7      |

|       |           |           |   |       |       |         |      |           |
|-------|-----------|-----------|---|-------|-------|---------|------|-----------|
| chrX  | 48319718  | 48320404  | + | -0.25 | 0.18  | 1.3E-02 | 0.12 | RBM3      |
| chrX  | 48545640  | 48546273  | + | -0.17 | 0.01  | 1.3E-02 | 0.12 | HDAC6     |
| chr4  | 483878    | 484652    | + | -0.20 | 0.22  | 1.3E-02 | 0.12 | PIGG      |
| chr19 | 47273762  | 47274425  | + | -0.18 | 0.09  | 1.3E-02 | 0.12 | ZNF574    |
| chr11 | 45126068  | 45126922  | + | -0.19 | 0.19  | 1.3E-02 | 0.12 | PRDM11    |
| chr17 | 62392962  | 62393523  | + | -0.13 | 0.06  | 1.4E-02 | 0.12 | CACNG4    |
| chr9  | 100596282 | 100597515 | - | -0.14 | 0.20  | 1.4E-02 | 0.12 | ANKS6     |
| chr11 | 6460616   | 6461207   | + | -0.39 | 0.29  | 1.4E-02 | 0.13 | FXC1      |
| chr3  | 51407226  | 51407994  | + | -0.14 | 0.20  | 1.4E-02 | 0.13 | RBM15B    |
| chr3  | 51407226  | 51407994  | - | -0.14 | 0.20  | 1.4E-02 | 0.13 | VPRBP     |
| chr17 | 7080439   | 7081174   | - | -0.14 | 0.23  | 1.4E-02 | 0.13 | GABARAP   |
| chr17 | 7080439   | 7081174   | - | -0.14 | 0.23  | 1.4E-02 | 0.13 | PHF23     |
| chrX  | 48822257  | 48823492  | - | -0.09 | 0.14  | 1.4E-02 | 0.13 | WDR45     |
| chr4  | 2252556   | 2253666   | - | -0.14 | 0.15  | 1.5E-02 | 0.13 | ZFYVE28   |
| chrX  | 153648386 | 153649052 | + | -0.21 | 0.20  | 1.5E-02 | 0.13 | DKC1      |
| chrX  | 153648386 | 153649052 | + | -0.21 | 0.20  | 1.5E-02 | 0.13 | SNORA36A  |
| chr4  | 48189773  | 48190508  | - | -0.16 | 0.17  | 1.5E-02 | 0.13 | FRYL      |
| chr4  | 48189773  | 48190508  | + | -0.16 | 0.17  | 1.5E-02 | 0.13 | ZAR1      |
| chr12 | 54786518  | 54787701  | + | -0.14 | 0.25  | 1.5E-02 | 0.13 | PA2G4     |
| chr17 | 39387600  | 39388733  | - | -0.15 | 0.11  | 1.5E-02 | 0.13 | PYY       |
| chrX  | 48786644  | 48787167  | - | -0.14 | 0.02  | 1.5E-02 | 0.13 | TFE3      |
| chr2  | 96849334  | 96849964  | + | -0.17 | 0.22  | 1.5E-02 | 0.13 | CNNM3     |
| chr13 | 31896076  | 31896864  | - | -0.23 | 0.11  | 1.5E-02 | 0.13 | N4BP2L1   |
| chr20 | 16499455  | 16500052  | - | -0.32 | 0.31  | 1.5E-02 | 0.13 | KIF16B    |
| chr20 | 33048988  | 33049549  | + | -0.28 | 0.04  | 1.6E-02 | 0.13 | MYH7B     |
| chr9  | 111443375 | 111443903 | + | -0.13 | 0.03  | 1.6E-02 | 0.13 | PALM2     |
| chr20 | 29772762  | 29773392  | - | -0.16 | 0.07  | 1.6E-02 | 0.13 | BCL2L1    |
| chr1  | 6290253   | 6291438   | - | -0.06 | 0.25  | 1.6E-02 | 0.13 | ACOT7     |
| chr11 | 30559392  | 30560166  | - | -0.19 | 0.20  | 1.6E-02 | 0.13 | MPPED2    |
| chr17 | 78268497  | 78269865  | + | -0.10 | 0.23  | 1.6E-02 | 0.13 | FN3KRP    |
| chr2  | 3683652   | 3684754   | + | -0.12 | 0.16  | 1.6E-02 | 0.13 | ALLC      |
| chr5  | 11435762  | 11436356  | - | -0.15 | 0.27  | 1.7E-02 | 0.13 | CTNND2    |
| chr18 | 74928557  | 74929212  | + | -0.28 | 0.19  | 1.7E-02 | 0.13 | ATP9B     |
| chr6  | 112516541 | 112517126 | + | -0.22 | 0.09  | 1.7E-02 | 0.13 | C6orf225  |
| chr3  | 192528827 | 192529382 | + | -0.13 | 0.06  | 1.7E-02 | 0.13 | CCDC50    |
| chr3  | 192528827 | 192529382 | - | -0.13 | 0.06  | 1.7E-02 | 0.13 | UTS2D     |
| chr4  | 54787801  | 54788500  | + | 0.07  | -0.14 | 1.7E-02 | 0.13 | PDGFRA    |
| chr16 | 79666962  | 79667733  | - | -0.12 | 0.07  | 1.7E-02 | 0.13 | C16orf46  |
| chr7  | 149702311 | 149704338 | + | -0.13 | 0.18  | 1.7E-02 | 0.13 | ZNF775    |
| chrX  | 50572120  | 50572679  | - | -0.20 | 0.08  | 1.7E-02 | 0.13 | SHROOM4   |
| chr7  | 36155998  | 36156641  | + | -0.33 | 0.21  | 1.7E-02 | 0.13 | EEPD1     |
| chr18 | 58343569  | 58344251  | + | -0.13 | 0.04  | 1.7E-02 | 0.13 | ZCCHC2    |
| chr2  | 73150164  | 73150884  | - | -0.13 | 0.03  | 1.7E-02 | 0.13 | RAB11FIP5 |
| chr2  | 73150164  | 73150884  | - | -0.13 | 0.03  | 1.7E-02 | 0.13 | SFXN5     |
| chr2  | 24866640  | 24867598  | + | -0.18 | 0.18  | 1.8E-02 | 0.13 | CENPO     |
| chr2  | 24866640  | 24867598  | - | -0.18 | 0.18  | 1.8E-02 | 0.13 | PTRHD1    |
| chr13 | 24340632  | 24341121  | + | -0.20 | 0.22  | 1.8E-02 | 0.13 | RNF17     |
| chr19 | 48838529  | 48839365  | - | -0.21 | 0.20  | 1.8E-02 | 0.13 | PLAUR     |

|       |           |           |   |       |       |         |      |            |
|-------|-----------|-----------|---|-------|-------|---------|------|------------|
| chr14 | 94853971  | 94854568  | - | -0.18 | 0.04  | 1.8E-02 | 0.13 | CLMN       |
| chr6  | 88008796  | 88009476  | + | -0.22 | 0.23  | 1.8E-02 | 0.13 | ZNF292     |
| chr4  | 21558225  | 21558858  | - | -0.13 | 0.03  | 1.8E-02 | 0.13 | KCNIP4     |
| chr10 | 72103618  | 72104348  | + | -0.17 | 0.12  | 1.9E-02 | 0.13 | ADAMTS14   |
| chr6  | 109909114 | 109909849 | - | -0.13 | 0.30  | 1.9E-02 | 0.13 | ZBTB24     |
| chr10 | 106103791 | 106104678 | + | -0.10 | 0.25  | 1.9E-02 | 0.13 | CCDC147    |
| chr6  | 144370101 | 144370715 | - | 0.11  | -0.16 | 1.9E-02 | 0.13 | HYMAI      |
| chr6  | 144370101 | 144370715 | - | 0.11  | -0.16 | 1.9E-02 | 0.13 | PLAGL1     |
| chr8  | 42025071  | 42025710  | - | -0.20 | 0.20  | 1.9E-02 | 0.13 | KAT6A      |
| chr18 | 5283123   | 5283748   | - | -0.25 | 0.26  | 2.0E-02 | 0.13 | ZFP161     |
| chr5  | 16752065  | 16752933  | - | -0.12 | 0.13  | 2.0E-02 | 0.13 | MYO10      |
| chr17 | 69708402  | 69709077  | + | -0.18 | 0.15  | 2.0E-02 | 0.13 | RPL38      |
| chr17 | 45941315  | 45942125  | + | -0.21 | 0.22  | 2.0E-02 | 0.13 | MYCBPAP    |
| chr9  | 964916    | 965699    | + | 0.09  | -0.08 | 2.0E-02 | 0.13 | DMRT3      |
| chr2  | 3453436   | 3454102   | + | -0.12 | 0.17  | 2.0E-02 | 0.13 | TTC15      |
| chr11 | 133286858 | 133287527 | - | -0.11 | 0.11  | 2.0E-02 | 0.13 | IGSF9B     |
| chr4  | 1159532   | 1160054   | - | -0.18 | 0.22  | 2.1E-02 | 0.13 | SPON2      |
| chr3  | 58254377  | 58255004  | + | -0.19 | 0.11  | 2.1E-02 | 0.13 | ABHD6      |
| chr18 | 33397919  | 33398483  | - | -0.14 | 0.03  | 2.1E-02 | 0.13 | CELF4      |
| chr9  | 123892239 | 123893541 | - | -0.15 | 0.04  | 2.1E-02 | 0.13 | TTLL11     |
| chr11 | 2865116   | 2865609   | - | -0.12 | 0.18  | 2.1E-02 | 0.13 | SLC22A18AS |
| chr14 | 56806614  | 56807172  | + | -0.29 | 0.36  | 2.1E-02 | 0.13 | MUDENG     |
| chr1  | 172393314 | 172393959 | + | -0.19 | 0.19  | 2.1E-02 | 0.13 | RABGAP1L   |
| chr10 | 79351812  | 79352483  | - | -0.20 | 0.16  | 2.2E-02 | 0.13 | DLG5       |
| chr22 | 30668396  | 30669235  | - | -0.24 | 0.15  | 2.2E-02 | 0.13 | C22orf24   |
| chr22 | 30668396  | 30669235  | + | -0.24 | 0.15  | 2.2E-02 | 0.13 | YWHAH      |
| chr12 | 122810256 | 122810917 | + | -0.15 | 0.18  | 2.2E-02 | 0.13 | ATP6V0A2   |
| chr12 | 122810256 | 122810917 | + | -0.15 | 0.18  | 2.2E-02 | 0.13 | DNAH10     |
| chr4  | 83700648  | 83701242  | - | -0.17 | 0.11  | 2.2E-02 | 0.13 | TMEM150C   |
| chr5  | 112848374 | 112849448 | - | -0.27 | 0.22  | 2.2E-02 | 0.13 | MCC        |
| chr16 | 75784275  | 75784839  | + | -0.23 | 0.26  | 2.2E-02 | 0.13 | MON1B      |
| chr8  | 87587760  | 87588516  | - | -0.16 | 0.18  | 2.2E-02 | 0.13 | FAM82B     |
| chr17 | 32381040  | 32383521  | + | -0.22 | 0.26  | 2.2E-02 | 0.13 | AATF       |
| chr8  | 23369164  | 23369692  | - | -0.19 | 0.13  | 2.3E-02 | 0.13 | ENTPD4     |
| chr2  | 96788621  | 96789179  | + | -0.23 | 0.21  | 2.3E-02 | 0.13 | CNNM4      |
| chr1  | 53457074  | 53457923  | - | -0.22 | 0.12  | 2.3E-02 | 0.13 | C1orf123   |
| chr4  | 8443294   | 8444156   | - | -0.16 | 0.15  | 2.3E-02 | 0.13 | ACOX3      |
| chrX  | 11684329  | 11685138  | + | -0.21 | 0.08  | 2.3E-02 | 0.13 | MSL3       |
| chrX  | 48907521  | 48908136  | + | -0.13 | 0.22  | 2.4E-02 | 0.13 | MAGIX      |
| chr12 | 55758479  | 55759146  | - | 0.01  | -0.22 | 2.4E-02 | 0.13 | TMEM194A   |
| chr11 | 2676311   | 2676665   | + | -0.13 | -0.02 | 2.4E-02 | 0.13 | KCNQ1      |
| chr11 | 2676311   | 2676665   | - | -0.13 | -0.02 | 2.4E-02 | 0.13 | KCNQ1OT1   |
| chr11 | 74822002  | 74822491  | - | -0.16 | 0.15  | 2.4E-02 | 0.13 | GDPD5      |
| chr19 | 15440703  | 15441300  | - | -0.21 | 0.34  | 2.4E-02 | 0.13 | PGLYRP2    |
| chr14 | 103094209 | 103094836 | - | -0.20 | 0.16  | 2.4E-02 | 0.13 | BAG5       |
| chr16 | 65747456  | 65747969  | + | -0.14 | 0.20  | 2.4E-02 | 0.13 | FBXL8      |
| chr16 | 65747456  | 65747969  | - | -0.14 | 0.20  | 2.4E-02 | 0.13 | TRADD      |
| chr1  | 57663713  | 57664358  | - | -0.23 | 0.26  | 2.4E-02 | 0.13 | DAB1       |

|       |           |           |   |       |       |         |      |              |
|-------|-----------|-----------|---|-------|-------|---------|------|--------------|
| chr12 | 27287335  | 27288136  | + | -0.21 | 0.23  | 2.4E-02 | 0.13 | STK38L       |
| chr9  | 37642272  | 37643031  | + | -0.04 | 0.26  | 2.4E-02 | 0.13 | FRMPD1       |
| chrX  | 47307607  | 47309064  | + | -0.21 | 0.14  | 2.5E-02 | 0.13 | ARAF         |
| chr10 | 131823502 | 131823955 | + | -0.28 | 0.18  | 2.5E-02 | 0.13 | GLRX3        |
| chr22 | 29696207  | 29696816  | + | -0.15 | 0.04  | 2.5E-02 | 0.13 | TUG1         |
| chr11 | 46319608  | 46320334  | + | -0.17 | 0.12  | 2.5E-02 | 0.13 | DGKZ         |
| chr1  | 201201028 | 201201796 | - | -0.20 | 0.23  | 2.5E-02 | 0.13 | CYB5R1       |
| chr1  | 220859486 | 220860119 | + | -0.16 | 0.22  | 2.5E-02 | 0.13 | MIA3         |
| chr17 | 4786819   | 4787482   | - | -0.10 | 0.22  | 2.6E-02 | 0.13 | PFN1         |
| chr17 | 4786819   | 4787482   | + | -0.10 | 0.22  | 2.6E-02 | 0.13 | RNF167       |
| chr1  | 59050928  | 59051796  | + | -0.23 | 0.09  | 2.6E-02 | 0.13 | LOC100131060 |
| chr7  | 149167479 | 149167971 | + | -0.20 | 0.19  | 2.6E-02 | 0.13 | ZNF862       |
| chr11 | 66811620  | 66812250  | + | -0.09 | 0.16  | 2.7E-02 | 0.13 | ANKRD13D     |
| chr11 | 65236788  | 65237484  | + | -0.09 | 0.13  | 2.7E-02 | 0.13 | KAT5         |
| chr19 | 5159373   | 5160045   | - | -0.40 | 0.18  | 2.7E-02 | 0.13 | PTPRS        |
| chr11 | 61485922  | 61486519  | + | -0.10 | 0.13  | 2.7E-02 | 0.13 | BEST1        |
| chr11 | 61485922  | 61486519  | - | -0.10 | 0.13  | 2.7E-02 | 0.13 | FTH1         |
| chr7  | 134503991 | 134504516 | - | -0.20 | 0.20  | 2.7E-02 | 0.13 | C7orf49      |
| chr13 | 101842779 | 101843855 | - | -0.16 | 0.07  | 2.8E-02 | 0.13 | FGF14-IT1    |
| chr13 | 101842779 | 101843855 | - | -0.16 | 0.07  | 2.8E-02 | 0.13 | FGF14        |
| chr13 | 101842779 | 101843855 | + | -0.16 | 0.07  | 2.8E-02 | 0.13 | LOC283481    |
| chr7  | 7977782   | 7978500   | + | -0.09 | 0.02  | 2.8E-02 | 0.13 | GLCCI1       |
| chr3  | 173911076 | 173911636 | - | 0.13  | -0.15 | 2.8E-02 | 0.13 | NCEH1        |
| chr20 | 11818365  | 11818911  | + | -0.11 | 0.03  | 2.8E-02 | 0.13 | BTBD3        |
| chr17 | 37517127  | 37517814  | - | -0.10 | 0.12  | 2.8E-02 | 0.13 | DHX58        |
| chr17 | 37517127  | 37517814  | - | -0.10 | 0.12  | 2.8E-02 | 0.13 | KAT2A        |
| chrX  | 151750686 | 151751139 | + | -0.23 | 0.03  | 2.8E-02 | 0.13 | NSDHL        |
| chr19 | 4345046   | 4345666   | - | -0.20 | 0.15  | 2.8E-02 | 0.13 | SH3GL1       |
| chr9  | 111297986 | 111299000 | - | -0.21 | 0.21  | 2.8E-02 | 0.13 | PTPN3        |
| chr20 | 18217674  | 18218608  | + | -0.16 | 0.14  | 2.8E-02 | 0.13 | ZNF133       |
| chr2  | 72966377  | 72967118  | + | -0.15 | 0.24  | 2.8E-02 | 0.13 | SPR          |
| chr7  | 75797667  | 75798120  | - | -0.25 | 0.15  | 2.8E-02 | 0.13 | YWHAG        |
| chrX  | 15603098  | 15603788  | + | 0.05  | -0.24 | 2.9E-02 | 0.13 | CA5BP1       |
| chr3  | 124226674 | 124227328 | - | -0.19 | 0.10  | 2.9E-02 | 0.13 | SEMA5B       |
| chr7  | 31341062  | 31341653  | - | -0.11 | 0.17  | 2.9E-02 | 0.13 | NEUROD6      |
| chr6  | 41756041  | 41756668  | - | -0.09 | 0.23  | 2.9E-02 | 0.13 | TFEB         |
| chr6  | 31742300  | 31742756  | + | -0.17 | 0.04  | 2.9E-02 | 0.13 | CSNK2B       |
| chr6  | 31742300  | 31742756  | + | -0.17 | 0.04  | 2.9E-02 | 0.13 | LY6G5B       |
| chr16 | 83241772  | 83242396  | + | -0.12 | 0.25  | 2.9E-02 | 0.13 | KLHL36       |
| chr17 | 28644700  | 28645440  | - | -0.15 | 0.07  | 2.9E-02 | 0.13 | ACCN1        |
| chr12 | 6471443   | 6472328   | - | -0.07 | 0.24  | 2.9E-02 | 0.13 | MRPL51       |
| chr12 | 6471443   | 6472328   | + | -0.07 | 0.24  | 2.9E-02 | 0.13 | NCAPD2       |
| chr11 | 2628364   | 2628957   | + | -0.11 | 0.02  | 3.0E-02 | 0.13 | KCNQ1        |
| chr11 | 2628364   | 2628957   | - | -0.11 | 0.02  | 3.0E-02 | 0.13 | KCNQ10T1     |
| chr12 | 32148845  | 32149833  | + | -0.16 | 0.21  | 3.0E-02 | 0.13 | BICD1        |
| chrX  | 30815860  | 30816520  | - | -0.15 | 0.00  | 3.0E-02 | 0.13 | TAB3         |
| chr11 | 33745709  | 33746195  | - | -0.16 | 0.21  | 3.0E-02 | 0.13 | FBXO3        |
| chr19 | 41126098  | 41127029  | + | -0.27 | 0.19  | 3.0E-02 | 0.13 | LRFN3        |

|       |           |           |   |       |       |         |      |              |
|-------|-----------|-----------|---|-------|-------|---------|------|--------------|
| chr10 | 718075    | 718793    | - | -0.15 | 0.19  | 3.0E-02 | 0.13 | DIP2C        |
| chr3  | 49036537  | 49037180  | - | -0.13 | 0.12  | 3.0E-02 | 0.13 | IMPDH2       |
| chr3  | 187560715 | 187561207 | - | -0.14 | 0.07  | 3.0E-02 | 0.13 | DGKG         |
| chr5  | 138560183 | 138561157 | - | -0.15 | 0.21  | 3.0E-02 | 0.13 | SIL1         |
| chr19 | 51939847  | 51940406  | + | -0.12 | 0.05  | 3.1E-02 | 0.13 | FKRP         |
| chr19 | 51939847  | 51940406  | - | -0.12 | 0.05  | 3.1E-02 | 0.13 | STRN4        |
| chr10 | 30386596  | 30387049  | - | -0.12 | 0.06  | 3.1E-02 | 0.13 | KIAA1462     |
| chr19 | 52708584  | 52709337  | - | -0.16 | 0.13  | 3.1E-02 | 0.13 | NAPA         |
| chr13 | 35440501  | 35441050  | - | -0.14 | 0.18  | 3.1E-02 | 0.13 | DCLK1        |
| chr17 | 40746938  | 40747424  | - | -0.19 | 0.11  | 3.1E-02 | 0.13 | MAP3K14      |
| chr7  | 49781252  | 49781834  | + | -0.15 | 0.26  | 3.1E-02 | 0.13 | VWC2         |
| chr11 | 109482228 | 109482717 | + | -0.28 | 0.12  | 3.1E-02 | 0.13 | ZC3H12C      |
| chr19 | 3934249   | 3934705   | - | -0.17 | 0.08  | 3.2E-02 | 0.13 | EEF2         |
| chr12 | 48509053  | 48509686  | + | -0.16 | 0.28  | 3.2E-02 | 0.13 | LOC100286844 |
| chr3  | 180852398 | 180852858 | + | -0.16 | 0.03  | 3.2E-02 | 0.13 | USP13        |
| chr17 | 25728563  | 25729177  | + | -0.18 | 0.11  | 3.2E-02 | 0.13 | CPD          |
| chr18 | 27928280  | 27929061  | + | -0.18 | 0.17  | 3.2E-02 | 0.13 | RNF138       |
| chr8  | 118031930 | 118032668 | + | -0.15 | 0.22  | 3.3E-02 | 0.13 | SLC30A8      |
| chr1  | 117010061 | 117010550 | - | -0.19 | 0.10  | 3.3E-02 | 0.13 | IGSF3        |
| chr15 | 57519355  | 57520073  | + | -0.15 | 0.24  | 3.3E-02 | 0.13 | FAM81A       |
| chr5  | 114540890 | 114541509 | - | -0.10 | 0.25  | 3.3E-02 | 0.13 | TRIM36       |
| chr17 | 2253255   | 2253875   | - | -0.15 | 0.18  | 3.3E-02 | 0.13 | LOC284009    |
| chr8  | 29172908  | 29173522  | - | -0.18 | 0.08  | 3.3E-02 | 0.13 | KIF13B       |
| chr12 | 122764552 | 122765113 | + | -0.15 | 0.25  | 3.3E-02 | 0.13 | ATP6V0A2     |
| chr6  | 112514720 | 112515281 | + | 0.07  | -0.16 | 3.4E-02 | 0.13 | C6orf225     |
| chr6  | 112514720 | 112515281 | - | 0.07  | -0.16 | 3.4E-02 | 0.13 | TUBE1        |
| chr22 | 47267067  | 47267700  | + | -0.12 | 0.12  | 3.4E-02 | 0.13 | FAM19A5      |
| chr19 | 63760156  | 63760853  | + | -0.12 | 0.10  | 3.4E-02 | 0.13 | LOC100131691 |
| chr19 | 63760156  | 63760853  | - | -0.12 | 0.10  | 3.4E-02 | 0.13 | UBE2M        |
| chr10 | 717061    | 717862    | - | -0.10 | 0.26  | 3.4E-02 | 0.13 | DIP2C        |
| chr22 | 28026417  | 28027337  | + | -0.16 | 0.19  | 3.4E-02 | 0.13 | EWSR1        |
| chr21 | 32169637  | 32170152  | + | -0.16 | 0.06  | 3.4E-02 | 0.13 | HUNK         |
| chr10 | 627677    | 628238    | - | -0.20 | 0.11  | 3.4E-02 | 0.13 | DIP2C        |
| chrX  | 48659914  | 48660439  | - | -0.16 | 0.07  | 3.4E-02 | 0.13 | OTUD5        |
| chrX  | 48659914  | 48660439  | - | -0.16 | 0.07  | 3.4E-02 | 0.13 | PIM2         |
| chr14 | 22602056  | 22602581  | - | -0.16 | 0.23  | 3.4E-02 | 0.13 | ACIN1        |
| chr11 | 111404692 | 111405870 | + | -0.22 | 0.12  | 3.4E-02 | 0.13 | DLAT         |
| chr4  | 47607910  | 47608450  | - | -0.19 | 0.14  | 3.4E-02 | 0.13 | NFXL1        |
| chr17 | 2595144   | 2595741   | - | -0.24 | 0.17  | 3.5E-02 | 0.13 | MIR1253      |
| chr12 | 13047385  | 13047970  | + | -0.21 | 0.22  | 3.5E-02 | 0.13 | HTR7P1       |
| chr5  | 176489559 | 176490322 | + | -0.15 | 0.12  | 3.5E-02 | 0.13 | NSD1         |
| chr9  | 22435479  | 22436177  | + | -0.23 | 0.27  | 3.5E-02 | 0.13 | DMRTA1       |
| chr11 | 129442869 | 129443874 | + | -0.22 | 0.14  | 3.5E-02 | 0.13 | APLP2        |
| chr10 | 18984451  | 18985048  | + | -0.13 | 0.27  | 3.5E-02 | 0.13 | ARL5B        |
| chr16 | 31140226  | 31140871  | + | -0.24 | 0.17  | 3.5E-02 | 0.13 | TRIM72       |
| chr11 | 17053254  | 17054110  | - | -0.17 | 0.22  | 3.5E-02 | 0.13 | RPS13        |
| chr7  | 120283648 | 120284242 | - | -0.12 | 0.11  | 3.6E-02 | 0.13 | TSPAN12      |
| chr14 | 28313409  | 28313938  | + | 0.07  | -0.14 | 3.6E-02 | 0.13 | C14orf23     |



|       |           |           |   |       |       |         |      |               |
|-------|-----------|-----------|---|-------|-------|---------|------|---------------|
| chrX  | 100490943 | 100491468 | - | -0.15 | 0.03  | 3.6E-02 | 0.13 | BTK<br>RPL17- |
| chr18 | 45271846  | 45272338  | - | -0.11 | 0.05  | 3.7E-02 | 0.13 | C18ORF32      |
| chr18 | 45271846  | 45272338  | - | -0.11 | 0.05  | 3.7E-02 | 0.13 | RPL17         |
| chr18 | 45271846  | 45272338  | - | -0.11 | 0.05  | 3.7E-02 | 0.13 | SNORD58B      |
| chr8  | 19843358  | 19843919  | + | -0.14 | 0.13  | 3.7E-02 | 0.13 | LPL           |
| chr20 | 61044569  | 61045097  | + | -0.23 | 0.16  | 3.7E-02 | 0.13 | C20orf11      |
| chrX  | 70360230  | 70360797  | + | -0.16 | 0.08  | 3.8E-02 | 0.13 | GJB1          |
| chr19 | 40730494  | 40731162  | - | -0.17 | 0.13  | 3.8E-02 | 0.13 | ATP4A         |
| chr12 | 47648751  | 47649299  | - | -0.17 | 0.09  | 3.8E-02 | 0.13 | WNT10B        |
| chr17 | 7084638   | 7085220   | - | -0.11 | 0.01  | 3.8E-02 | 0.13 | CTDNBP1       |
| chr17 | 7084638   | 7085220   | - | -0.11 | 0.01  | 3.8E-02 | 0.13 | GABARAP       |
| chr13 | 38163297  | 38163822  | + | -0.12 | 0.26  | 3.8E-02 | 0.13 | FREM2         |
| chr8  | 81245286  | 81245745  | - | -0.18 | 0.07  | 3.8E-02 | 0.13 | TPD52         |
| chr3  | 194442742 | 194443333 | + | -0.14 | 0.05  | 3.8E-02 | 0.13 | HRASLS        |
| chr3  | 194442742 | 194443333 | + | -0.14 | 0.05  | 3.8E-02 | 0.13 | MGC2889       |
| chr2  | 9482490   | 9483232   | + | -0.35 | 0.16  | 3.8E-02 | 0.13 | CPSF3         |
| chrX  | 113726128 | 113726653 | + | -0.14 | 0.04  | 3.8E-02 | 0.13 | HTR2C         |
| chr17 | 33873596  | 33874124  | + | -0.17 | 0.05  | 3.8E-02 | 0.13 | ARHGAP23      |
| chr2  | 73315753  | 73316506  | + | -0.13 | 0.14  | 3.8E-02 | 0.13 | CCT7          |
| chrX  | 9401174   | 9401806   | + | -0.18 | 0.25  | 3.9E-02 | 0.13 | TBL1X         |
| chr7  | 6179112   | 6179634   | - | 0.13  | -0.07 | 3.9E-02 | 0.13 | CYTH3         |
| chr17 | 33862654  | 33863074  | + | -0.23 | 0.08  | 3.9E-02 | 0.13 | ARHGAP23      |
| chr12 | 107571939 | 107575062 | - | -0.13 | 0.11  | 3.9E-02 | 0.13 | CORO1C        |
| chr2  | 241857067 | 241857595 | - | -0.07 | 0.26  | 3.9E-02 | 0.13 | HDLBP         |
| chr1  | 154314843 | 154315422 | - | -0.15 | 0.27  | 3.9E-02 | 0.13 | MEX3A         |
| chr1  | 32442122  | 32442679  | + | -0.11 | 0.17  | 3.9E-02 | 0.13 | CCDC28B       |
| chr1  | 32442122  | 32442679  | + | -0.11 | 0.17  | 3.9E-02 | 0.13 | IQCC          |
| chr8  | 10502949  | 10503579  | - | -0.14 | 0.24  | 3.9E-02 | 0.13 | RP1L1         |
| chr11 | 6586698   | 6587224   | + | -0.16 | 0.22  | 3.9E-02 | 0.13 | ILK           |
| chr11 | 6586698   | 6587224   | - | -0.16 | 0.22  | 3.9E-02 | 0.13 | TAF10         |
| chr11 | 6586698   | 6587224   | - | -0.16 | 0.22  | 3.9E-02 | 0.13 | TPP1          |
| chr11 | 66949660  | 66951976  | + | -0.19 | 0.12  | 3.9E-02 | 0.13 | RPS6KB2       |
| chr2  | 97645203  | 97645688  | - | -0.14 | 0.08  | 4.0E-02 | 0.13 | ACTR1B        |
| chr10 | 79064449  | 79064961  | - | -0.11 | 0.02  | 4.0E-02 | 0.13 | KCNMA1        |
| chr19 | 50235063  | 50235555  | + | -0.16 | 0.17  | 4.0E-02 | 0.13 | CLASRP        |
| chr2  | 238198882 | 238199431 | + | -0.11 | 0.21  | 4.0E-02 | 0.13 | LRRFIP1       |
| chr21 | 44230555  | 44231116  | + | -0.18 | 0.08  | 4.0E-02 | 0.13 | AGPAT3        |
| chr15 | 81410867  | 81411320  | - | -0.10 | 0.10  | 4.0E-02 | 0.13 | HOMER2        |
| chr19 | 44030070  | 44030901  | - | -0.19 | 0.09  | 4.1E-02 | 0.13 | HNRNPL        |
| chr3  | 161187883 | 161188548 | + | -0.15 | 0.25  | 4.1E-02 | 0.13 | IL12A         |
| chr7  | 6582296   | 6582791   | + | -0.18 | 0.25  | 4.1E-02 | 0.13 | ZDHHC4        |
| chr6  | 150501718 | 150502280 | + | -0.15 | 0.21  | 4.1E-02 | 0.13 | PPP1R14C      |
| chr16 | 54780036  | 54780705  | - | -0.15 | 0.08  | 4.1E-02 | 0.13 | DKFZP434H168  |
| chr16 | 54780036  | 54780705  | + | -0.15 | 0.08  | 4.1E-02 | 0.13 | GNAO1         |
| chr16 | 54780036  | 54780705  | - | -0.15 | 0.08  | 4.1E-02 | 0.13 | LOC283856     |
| chr1  | 31853842  | 31854363  | + | -0.15 | 0.22  | 4.2E-02 | 0.13 | HCRTR1        |
| chr7  | 142690513 | 142691038 | + | -0.18 | 0.20  | 4.2E-02 | 0.13 | TMEM139       |

|       |           |           |   |       |       |         |      |            |
|-------|-----------|-----------|---|-------|-------|---------|------|------------|
| chr4  | 7099357   | 7099921   | + | -0.07 | 0.14  | 4.2E-02 | 0.13 | TADA2B     |
| chr11 | 63767443  | 63767896  | + | -0.15 | 0.28  | 4.2E-02 | 0.13 | FKBP2      |
| chr11 | 63767443  | 63767896  | - | -0.15 | 0.28  | 4.2E-02 | 0.13 | PPP1R14B   |
| chr15 | 41573307  | 41573927  | - | -0.13 | 0.07  | 4.2E-02 | 0.13 | TP53BP1    |
| chr16 | 65169614  | 65170214  | + | -0.11 | 0.17  | 4.2E-02 | 0.13 | CKLF-CMTM1 |
| chr16 | 65169614  | 65170214  | + | -0.11 | 0.17  | 4.2E-02 | 0.13 | CMTM1      |
| chr16 | 65169614  | 65170214  | + | -0.11 | 0.17  | 4.2E-02 | 0.13 | CMTM2      |
| chr4  | 187530917 | 187531475 | - | -0.15 | 0.13  | 4.2E-02 | 0.13 | LOC285441  |
| chr12 | 31999188  | 31999939  | + | -0.18 | 0.22  | 4.2E-02 | 0.13 | C12orf35   |
| chr2  | 25325753  | 25326311  | - | -0.04 | 0.24  | 4.2E-02 | 0.13 | DNMT3A     |
| chr14 | 23779701  | 23780226  | - | -0.17 | 0.27  | 4.2E-02 | 0.13 | TINF2      |
| chr13 | 22939387  | 22939912  | + | -0.19 | 0.11  | 4.3E-02 | 0.13 | LINC00327  |
| chr20 | 36321174  | 36321881  | - | -0.15 | 0.00  | 4.3E-02 | 0.13 | KIAA1755   |
| chr11 | 22320376  | 22320800  | + | 0.10  | -0.16 | 4.3E-02 | 0.13 | SLC17A6    |
| chr7  | 4866074   | 4866527   | - | -0.26 | 0.21  | 4.4E-02 | 0.13 | PAPOLB     |
| chr7  | 4866074   | 4866527   | - | -0.26 | 0.21  | 4.4E-02 | 0.13 | RADIL      |
| chrX  | 96026295  | 96026845  | + | -0.13 | 0.16  | 4.4E-02 | 0.13 | DIAPH2     |
| chrX  | 96026295  | 96026845  | + | -0.13 | 0.16  | 4.4E-02 | 0.13 | RPA4       |
| chr11 | 31781425  | 31781989  | - | 0.09  | -0.10 | 4.4E-02 | 0.13 | PAX6       |
| chr17 | 33859199  | 33859763  | + | -0.18 | 0.09  | 4.4E-02 | 0.13 | ARHGAP23   |
| chr18 | 9696406   | 9696970   | + | -0.16 | 0.22  | 4.4E-02 | 0.13 | RAB31      |
| chr8  | 22074998  | 22075518  | + | -0.11 | 0.22  | 4.4E-02 | 0.13 | BMP1       |
| chr8  | 22074998  | 22075518  | + | -0.11 | 0.22  | 4.4E-02 | 0.13 | SFTPC      |
| chr9  | 135209461 | 135210152 | - | -0.16 | 0.12  | 4.4E-02 | 0.13 | SURF1      |
| chr9  | 135209461 | 135210152 | + | -0.16 | 0.12  | 4.4E-02 | 0.13 | SURF2      |
| chrX  | 118622830 | 118623396 | - | -0.12 | 0.02  | 4.4E-02 | 0.13 | NKRF       |
| chr6  | 26647985  | 26648477  | + | -0.14 | 0.27  | 4.4E-02 | 0.13 | HMGNA4     |
| chr19 | 4916933   | 4917488   | + | -0.15 | 0.11  | 4.4E-02 | 0.13 | KDM4B      |
| chr11 | 125583297 | 125583846 | + | -0.08 | 0.18  | 4.4E-02 | 0.13 | FAM118B    |
| chr11 | 125583297 | 125583846 | - | -0.08 | 0.18  | 4.4E-02 | 0.13 | RPUSD4     |
| chr19 | 54839410  | 54839998  | + | -0.18 | 0.21  | 4.4E-02 | 0.13 | SCAF1      |
| chr12 | 56294287  | 56294746  | + | -0.20 | 0.21  | 4.5E-02 | 0.13 | ARHGEF25   |
| chr18 | 8777822   | 8778278   | + | -0.18 | 0.10  | 4.5E-02 | 0.13 | CCDC165    |
| chr12 | 56310028  | 56310610  | - | -0.13 | 0.06  | 4.5E-02 | 0.13 | B4GALNT1   |
| chr3  | 154034189 | 154034681 | + | -0.25 | 0.16  | 4.5E-02 | 0.13 | P2RY1      |
| chr7  | 82831446  | 82831935  | - | -0.16 | 0.11  | 4.6E-02 | 0.13 | SEMA3E     |
| chr12 | 50715779  | 50716235  | + | -0.17 | 0.10  | 4.6E-02 | 0.13 | NR4A1      |
| chr15 | 99839721  | 99840282  | - | -0.11 | 0.12  | 4.6E-02 | 0.13 | PCSK6      |
| chr19 | 15420185  | 15420671  | + | -0.12 | 0.05  | 4.6E-02 | 0.13 | MIR1470    |
| chr19 | 15420185  | 15420671  | - | -0.12 | 0.05  | 4.6E-02 | 0.13 | RASAL3     |
| chr19 | 15420185  | 15420671  | - | -0.12 | 0.05  | 4.6E-02 | 0.13 | WIZ        |
| chr12 | 47008744  | 47009236  | + | -0.06 | 0.22  | 4.6E-02 | 0.13 | H1FNT      |
| chr5  | 177946841 | 177947366 | - | -0.19 | 0.07  | 4.6E-02 | 0.13 | COL23A1    |
| chr15 | 29409641  | 29410133  | + | -0.21 | 0.09  | 4.6E-02 | 0.13 | KLF13      |
| chr6  | 26138210  | 26138738  | - | -0.21 | 0.23  | 4.6E-02 | 0.13 | HIST1H2AB  |
| chr6  | 26138210  | 26138738  | - | -0.21 | 0.23  | 4.6E-02 | 0.13 | HIST1H3B   |
| chr14 | 67156961  | 67157483  | + | -0.13 | 0.03  | 4.6E-02 | 0.13 | ARG2       |
| chr2  | 105867156 | 105867576 | + | -0.17 | 0.16  | 4.6E-02 | 0.13 | NCK2       |

|       |           |           |   |       |       |         |      |             |
|-------|-----------|-----------|---|-------|-------|---------|------|-------------|
| chr16 | 8963040   | 8963490   | - | -0.15 | 0.07  | 4.7E-02 | 0.13 | USP7        |
| chr20 | 60055875  | 60056406  | - | 0.12  | -0.10 | 4.7E-02 | 0.13 | TAF4        |
| chr6  | 33155034  | 33155583  | - | -0.21 | 0.06  | 4.7E-02 | 0.13 | HLA-DPA1    |
| chr6  | 33155034  | 33155583  | + | -0.21 | 0.06  | 4.7E-02 | 0.13 | HLA-DPB1    |
| chr7  | 126677088 | 126677508 | - | -0.16 | 0.05  | 4.7E-02 | 0.13 | GRM8        |
| chr21 | 15357216  | 15357666  | - | -0.08 | 0.01  | 4.7E-02 | 0.13 | NRIP1       |
| chr9  | 98655007  | 98655466  | - | -0.16 | 0.05  | 4.7E-02 | 0.13 | ZNF782      |
| chr11 | 2672645   | 2673170   | + | -0.14 | 0.12  | 4.7E-02 | 0.13 | KCNQ1       |
| chr11 | 2672645   | 2673170   | - | -0.14 | 0.12  | 4.7E-02 | 0.13 | KCNQ10T1    |
| chr8  | 79739505  | 79739991  | + | -0.21 | 0.21  | 4.7E-02 | 0.13 | FAM164A     |
| chr5  | 139262484 | 139262937 | - | -0.18 | 0.19  | 4.7E-02 | 0.13 | NRG2        |
| chr19 | 16060922  | 16061372  | + | -0.26 | 0.11  | 4.7E-02 | 0.13 | TPM4        |
| chr5  | 179212218 | 179212826 | - | -0.28 | 0.17  | 4.7E-02 | 0.13 | C5orf45     |
| chr1  | 113061023 | 113061548 | + | -0.16 | 0.18  | 4.8E-02 | 0.13 | FAM19A3     |
| chr13 | 112682119 | 112682575 | + | 0.17  | -0.12 | 4.8E-02 | 0.13 | MCF2L       |
| chr11 | 2801295   | 2801823   | + | -0.26 | 0.22  | 4.8E-02 | 0.13 | KCNQ1       |
| chr16 | 15654429  | 15654921  | + | -0.17 | 0.10  | 4.9E-02 | 0.13 | NDE1        |
| chr2  | 175056895 | 175057420 | - | -0.13 | 0.22  | 4.9E-02 | 0.13 | GPR155      |
| chr10 | 31342256  | 31342766  | - | -0.14 | 0.12  | 4.9E-02 | 0.13 | ZNF438      |
| chr3  | 46908328  | 46908745  | + | -0.21 | 0.06  | 4.9E-02 | 0.13 | PTH1R       |
| chr12 | 47635774  | 47636197  | - | -0.18 | 0.05  | 4.9E-02 | 0.13 | ARF3        |
| chr18 | 44981829  | 44982285  | - | -0.23 | 0.21  | 4.9E-02 | 0.13 | DYM         |
| chr11 | 64859347  | 64862294  | + | -0.14 | 0.07  | 5.0E-02 | 0.13 | DPF2        |
| chr8  | 1911335   | 1911899   | + | -0.14 | 0.08  | 5.0E-02 | 0.13 | KBTBD11     |
| chr1  | 110001637 | 110002177 | + | -0.15 | 0.17  | 5.0E-02 | 0.13 | GSTM4       |
| chr16 | 4404218   | 4404674   | - | -0.17 | 0.06  | 5.0E-02 | 0.13 | CORO7-PAM16 |
| chr16 | 4404218   | 4404674   | - | -0.17 | 0.06  | 5.0E-02 | 0.13 | CORO7       |
| chr16 | 30695692  | 30696079  | - | -0.21 | 0.13  | 5.0E-02 | 0.13 | ZNF629      |
| chr11 | 111095622 | 111096114 | + | -0.07 | 0.14  | 5.0E-02 | 0.13 | SIK2        |

---
